# Supplementary material for: Colostrum Quality Assessment in Dairy Goats: Use of an On-Farm Optical Refractometer
Source: MDPI journal article supplement (doi:10.3390/biology12040626), 2023-04-20
Supplement: s1 [file s1]

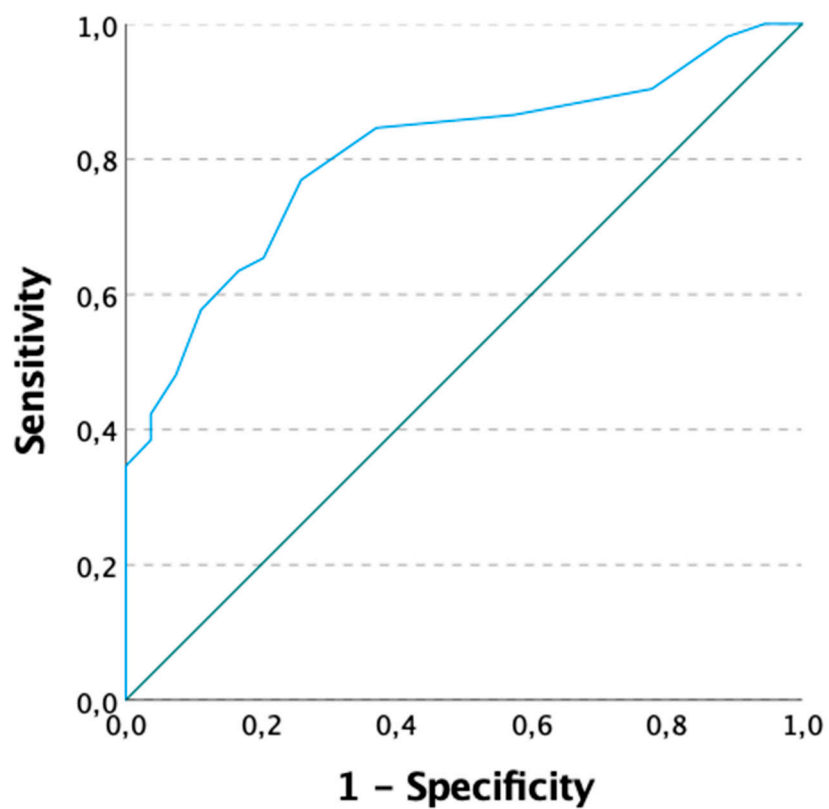

**Figure S1.** ROC curve for the detection of good-quality colostrum (based on cut-off threshold of 20 mg/ml as measured by ELISA) using an optical Brix refractometer to estimate the quality of fresh goat colostrum samples measured by ELISA.

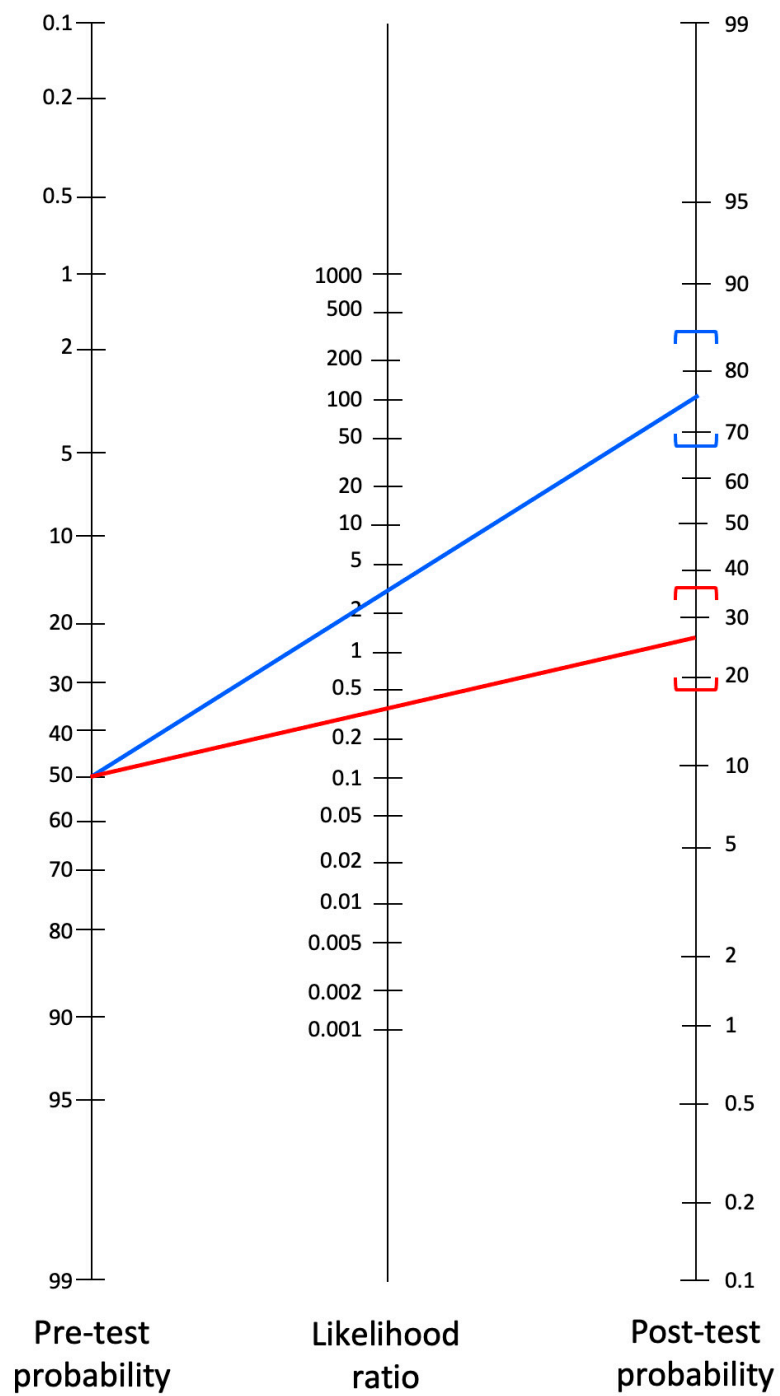

**Figure S2.** Fagan's nomogram to determine post-test probability of fresh colostrum Brix refractometer values detecting low IgG values (<20 mg/ml).

**Table S1.** Sensitivity, specificity and Youden index of Brix refractometer scores to predict colostrum IgG values higher than 20 mg/ml.

| Cut-off value<br>of Brix value | Sensitivity (%) | Specificity (%) | Youden index |
|--------------------------------|-----------------|-----------------|--------------|
| 11                             | 100             | 0               | 0            |
| 12                             | 100             | 5.6             | 0.056        |
| 13                             | 98.1            | 11.1            | 0.092        |
| 14                             | 90.4            | 22.2            | 0.126        |
| 15                             | 86.5            | 42.6            | 0.291        |
| 16                             | 84.6            | 63.0            | 0.476        |
| 17                             | 80.8            | 68.5            | 0.493        |
| 18                             | 76.9            | 74.1            | <b>0.510</b> |
| 19                             | 65.4            | 79.6            | 0.450        |
| 20                             | 63.5            | 83.3            | 0.468        |
| 21                             | 57.7            | 88.9            | 0.466        |
| 22                             | 48.1            | 92.6            | 0.407        |
| 23                             | 42.3            | 96.3            | 0.386        |
| 24                             | 38.5            | 96.3            | 0.348        |
| 25                             | 34.6            | 100             | 0.346        |
| 26                             | 26.9            | 100             | 0.269        |
| 27                             | 19.2            | 100             | 0.192        |
| 28                             | 15.4            | 100             | 0.154        |
| 29                             | 13.5            | 100             | 0.135        |
| 30                             | 11.5            | 100             | 0.115        |
| 31                             | 9.6             | 100             | 0.096        |
| 32                             | 7.7             | 100             | 0.077        |
| 33                             | 5.8             | 100             | 0.058        |
| 34                             | 3.8             | 100             | 0.038        |
| 35                             | 1.9             | 100             | 0.019        |
| 35                             | 0               | 100             | 0            |
